# Supplementary material for: Survey on the presence of palliative care knowledge and palliative care structures in German emergency departments
Source: PubMed Central journal article supplement (PMC10692016; doi:10.1007/s00101-023-01356-3), 2023-11-23
Supplement: 101_2023_1356_MOESM1_ESM.pdf [file 101_2023_1356_MOESM1_ESM.pdf]

**Zusatzmaterial zum Beitrag** „Befragung zum Vorhandensein palliativmedizinischen Wissens sowie palliativmedizinischer Strukturen in deutschen Notaufnahmen“ von Böhm L, Schwartz J, Michael M et al. (2023) in *Die Anaesthesiologie*.

Beitrag und Zusatzmaterial stehen Ihnen auf [www.springermedizin.de](http://www.springermedizin.de) zur Verfügung. Bitte geben Sie dort den Beitragstitel in die Suche ein.

# Befragung zum IST-Zustand palliativmedizinischen Wissens und zur Verfügbarkeit palliativmedizinischer Ressourcen in deutschen Notaufnahmen

## Biographische Angaben

### 1. Wie alt sind Sie?

- a) 23 - 35 Jahre
- b) 36 - 45 Jahre
- c) 46 – 55 Jahre
- d) 56 – 67 Jahre
- e) 67 Jahre und älter

### 2. Welches Geschlecht haben Sie?

- männlich    weiblich    divers

### 3. Welchen Facharzt haben Sie erworben bzw. streben Sie an?

- a) Innere Medizin
- b) Chirurgie
- c) Orthopädie/Unfallchirurgie
- d) Anästhesiologie
- e) Neurologie
- f) Sonstiger: \_\_\_\_\_

### 4. Wie würden Sie Ihre Anstellung in der Notaufnahme beschreiben?

- a) Festanstellung
- b) Freiberufliche Tätigkeit
- c) Gestellung aus anderer Klinik des Hauses in Rotation
- d) Anders, nämlich: \_\_\_\_\_

### 5. Wie viele Jahre sind Sie bereits in Notaufnahmen tätig?

- a) 0 – 2 Jahre
- b) 3 - 6 Jahre
- c) 7 – 10 Jahre

- d) 11 – 15 Jahre
- e) 16 – 20 Jahre
- f) Mehr als 20 Jahre

**6. Sie sind tätig als:**

- a) Arzt/Ärztin in Weiterbildung
- b) Facharzt/Fachärztin
- c) Arzt/Ärztin in Leitungsfunktion

**7. Welche der folgenden Zusatzbezeichnungen besitzen Sie (Mehrfachnennung möglich):**

- a) Palliativmedizin
- b) Klinische Akut- und Notfallmedizin
- c) Intensivmedizin
- d) Notfallmedizin

**8. Wie oft haben Sie im letzten Jahr an Fortbildungen (inkl. einzelnen Vorträgen im Rahmen z.B. größerer Kongresse) mit palliativmedizinischem Inhalt teilgenommen?**

- a) Gar nicht
- b) einmal
- c) 2-3 mal
- d) häufiger

## Palliatives Wissen und Kompetenz

Bitte schätzen Sie Ihre Einstellung zu den folgenden Fragen / Feststellungen ein:

**9. „Ich behandle in der Notaufnahme oft Patienten mit einer palliativen Krankheitssituation.“**

- a) Stimme voll zu
- b) Stimme eher zu
- c) Neutral
- d) Stimme eher nicht zu
- e) Stimme gar nicht zu

**10. „Ich fühle mich im Umgang mit Palliativpatienten sicher.“**

- a) Stimme voll zu
- b) Stimme eher zu
- c) Neutral
- d) Stimme eher nicht zu
- e) Stimme gar nicht zu

**11. „Ich führe an solchen Patienten häufig palliative Maßnahmen zur Symptomkontrolle durch (z. B. Morphingabe bei Dyspnoe).“**

- a) Stimme voll zu
- b) Stimme eher zu
- c) Neutral
- d) Stimme eher nicht zu
- e) Stimme gar nicht zu

**12. „Ich wurde in meinem Studium oder meiner Weiterbildung auf die Behandlung und den Umgang mit sterbenden Patienten und deren Angehörigen geschult.“**

- a) Stimme voll zu
- b) Stimme eher zu
- c) Neutral
- d) Stimme eher nicht zu
- e) Stimme gar nicht zu

**13. „Ich wende in meiner täglichen Praxis die „surprise question“ („Wären Sie überrascht, wenn Ihr Patient innerhalb der nächsten (6)12 Monate versterben würde?“) an, um potentielle Palliativpatienten zu identifizieren“**

- a) Stimme voll zu
- b) Stimme eher zu
- c) Neutral
- d) Stimme eher nicht zu
- e) Stimme gar nicht zu

## Palliative Haltung

Bitte schätzen Sie Ihre Einstellung zu den folgenden Fragen / Feststellungen ein:

**14. „Eine rein symptomatische Therapie ist nicht Aufgabe der Notaufnahme, sondern sollte auf Station erfolgen.“**

- a) Stimme voll zu
- b) Stimme eher zu
- c) Neutral
- d) Stimme eher nicht zu
- e) Stimme gar nicht zu

**15. „In der Notaufnahme ist die Behandlung der zur Vorstellung führenden Beschwerden wichtiger, als an palliativmedizinische Anbindung zu denken.“**

- a) Stimme voll zu
- b) Stimme eher zu
- c) Neutral
- d) Stimme eher nicht zu
- e) Stimme gar nicht zu

**16. „Bei infauster Prognose kann die Notaufnahme nichts mehr für den Patienten tun.“**

- a) Stimme voll zu
- b) Stimme eher zu
- c) Neutral
- d) Stimme eher nicht zu
- e) Stimme gar nicht zu

**17. „Sterbende Patienten sollten so rasch wie möglich auf eine Station aufgenommen werden, da ansonsten ein zu hoher Ressourcenverbrauch in der Notaufnahme entsteht.“**

- a) Stimme voll zu
- b) Stimme eher zu
- c) Neutral
- d) Stimme eher nicht zu
- e) Stimme gar nicht zu

## Innerklinische Ressourcen

Im Folgenden wollen wir Ihnen einige Fragen zur Verfügbarkeit palliativmedizinischer Expertise in Ihrer Klinik stellen.

**18. Gibt es in Ihrem Krankenhaus die Möglichkeit, spezialisierten, palliativmedizinischen Rat durch Kollegen mit der Zusatzweiterbildung „Palliativmedizin“ einzuholen (z.B. im Rahmen eines palliativmedizinischen (Konsiliar)-Dienstes?)**

- a) Ja
- b) Nein

Falls Sie ja angegeben haben, beantworten Sie bitte die folgenden Fragen:

**19. Der Palliativmedizinische Dienst kommt in die Notaufnahme, wenn er um ein Konsil gebeten wird.**

- a) Ja
- b) Nein
- c) Keine Angabe/Weiß nicht

**20. Wie viele Konsile werden im Jahr durch die Notaufnahme an den Palliativmedizinischen (Konsil)-Dienst gestellt?**

rund \_\_\_\_\_

**21. Die Ergebnisse, Interventionen oder Beurteilungen des palliativmedizinischen (Konsil)-Dienstes in der Notaufnahme sind hilfreich.**

- a) Stimme voll zu
- b) Stimme eher zu
- c) Neutral
- d) Stimme eher nicht zu
- e) Stimme gar nicht zu

**22. In meiner Notaufnahme gibt es Vorbehalte gegenüber dem Hinzuziehen der spezialisierten Palliativmedizin.**

- a) Stimme voll zu
- b) Stimme eher zu
- c) Neutral
- d) Stimme eher nicht zu
- e) Stimme gar nicht zu

Bei Zugriff auf einen palliativmedizinischen Konsiliardienst (Frage 18 mit „ja“ beantwortet):  
 Auslösende Faktoren für Mitbehandlung durch die spezialisierte Palliativmedizin –  
 Im Folgenden sollen potentielle Situationen beleuchtet werden. Bitte geben Sie an, ob Sie in diesem  
 Fall bei Verfügbarkeit ein Konsil an die spezialisierte Palliativmedizin stellen würden.

| <b>Ich stelle ein Palliativkonsil...</b>                                                                                                                                                             | <b>Ja</b> | <b>Nein</b> | <b>k.A.</b> |
|------------------------------------------------------------------------------------------------------------------------------------------------------------------------------------------------------|-----------|-------------|-------------|
| wenn mich der Tod des Patienten in den nächsten 12 Monaten nicht überraschen würde („surprise question“)                                                                                             |           |             |             |
| wenn die Familie um eine palliativmedizinische Mitbehandlung gebeten hat.                                                                                                                            |           |             |             |
| wenn der Patient um eine palliativmedizinische Mitbehandlung gebeten hat.                                                                                                                            |           |             |             |
| Bei anhaltender, nicht kontrollierbarer Symptomlast des Patienten ( z. B. Schmerzen, Dyspnoe)                                                                                                        |           |             |             |
| wenn der Patient lebensverlängernde oder kurative Therapiemaßnahmen ablehnt.                                                                                                                         |           |             |             |
| wenn der Patient eine mittlere Überlebenschance von weniger als 6 Monaten hat.                                                                                                                       |           |             |             |
| Wenn der Patient bereits an eine SAPV angebunden ist                                                                                                                                                 |           |             |             |
| Wenn der Patient bei einem früheren Aufenthalt durch den Palliativdienst betreut wurde                                                                                                               |           |             |             |
| wenn der Patient in der Finalphase ist.                                                                                                                                                              |           |             |             |
| wenn der Patient einen Todeswunsch äußert oder über Suizidgedanken spricht.                                                                                                                          |           |             |             |
| wenn der Patient einen nicht operablen bösartigen Tumor oder eine Pleura-/Peritonealkarzinose oder eine Meningiosis carcinomatosa hat.                                                               |           |             |             |
| wenn der Patient die Diagnose eines malignen, hochaktiven Tumors hat.                                                                                                                                |           |             |             |
| wenn dem Patienten die Erstdiagnose eines nicht heilbaren Tumors mitgeteilt wird.                                                                                                                    |           |             |             |
| wenn der Patient über 80 Jahre alt ist und zwei oder mehr lebensbedrohlichen Komorbiditäten vorliegen ( z. B. Nierenerkrankung im Endstadium, schweres kongestives Herzversagen).                    |           |             |             |
| wenn der Patient mehrfach im letzten halben Jahr aufgrund großer Symptomlast einer fortschreitenden Erkrankung (z.B. Dyspnoe bei COPD Gold 4 oder Herzinsuffizienz NYHA 4) aufgenommen werden musste |           |             |             |
| wenn der Patient an einer progredienten unheilbaren neurologischen Erkrankung leidet (z.B. Chorea Huntington, ALS)                                                                                   |           |             |             |
| wenn der Patient freiwillig auf Nahrung und Flüssigkeit verzichtet, um das eigene Leben zu beenden (Sterbefasten).                                                                                   |           |             |             |

Falls kein Palliativkonsil verfügbar ist (Frage 18 mit „nein“ beantwortet): :

Im Folgenden sollen potentielle Situationen beleuchtet werden. Bitte geben Sie an, ob Sie sich in diesen Situationen Unterstützung durch eine/einen SpezialistIn für Palliativmedizin wünschen würden:

| <b>Ich würde mir Unterstützung durch die Palliativmedizin wünschen,</b>                                                                                                                              | <b>Ja</b> | <b>Nein</b> | <b>k.A.</b> |
|------------------------------------------------------------------------------------------------------------------------------------------------------------------------------------------------------|-----------|-------------|-------------|
| wenn mich der Tod des Patienten in den nächsten 12 Monaten nicht überraschen würde („surprise question“)                                                                                             |           |             |             |
| wenn die Familie um eine palliativmedizinische Mitbehandlung gebeten hat.                                                                                                                            |           |             |             |
| wenn der Patient um eine palliativmedizinische Mitbehandlung gebeten hat.                                                                                                                            |           |             |             |
| Bei anhaltender, nicht kontrollierbarer Symptomlast des Patienten ( z. B. Schmerzen, Dyspnoe)                                                                                                        |           |             |             |
| wenn der Patient lebensverlängernde oder kurative Therapiemaßnahmen ablehnt.                                                                                                                         |           |             |             |
| wenn der Patient eine mittlere Überlebenschance von weniger als 6 Monaten hat.                                                                                                                       |           |             |             |
| Wenn der Patient bereits an eine SAPV angebunden ist                                                                                                                                                 |           |             |             |
| wenn der Patient in der Finalphase ist.                                                                                                                                                              |           |             |             |
| wenn der Patient einen Todeswunsch äußert oder über Suizidgedanken spricht.                                                                                                                          |           |             |             |
| wenn der Patient einen nicht operablen bösartigen Tumor oder eine Pleura-/Peritonealkarzinose oder eine Meningiosis carcinomatosa hat.                                                               |           |             |             |
| wenn der Patient die Diagnose eines malignen, hochaktiven Tumors hat.                                                                                                                                |           |             |             |
| wenn dem Patienten die Erstdiagnose eines nicht heilbaren Tumors mitgeteilt wird.                                                                                                                    |           |             |             |
| wenn der Patient über 80 Jahre alt ist und zwei oder mehr lebensbedrohlichen Komorbiditäten vorliegen ( z. B. Nierenerkrankung im Endstadium, schweres kongestives Herzversagen).                    |           |             |             |
| wenn der Patient mehrfach im letzten halben Jahr aufgrund großer Symptomlast einer fortschreitenden Erkrankung (z.B. Dyspnoe bei COPD Gold 4 oder Herzinsuffizienz NYHA 4) aufgenommen werden musste |           |             |             |
| wenn der Patient an einer progredienten unheilbaren neurologischen Erkrankung leidet (z.B. Chorea Huntington, ALS)                                                                                   |           |             |             |
| wenn der Patient freiwillig auf Nahrung und Flüssigkeit verzichtet, um das eigene Leben zu beenden (Sterbefasten).                                                                                   |           |             |             |

(Frage 18 mit „ja“ beantwortet“): Einfluss des Palliativmedizinischen (Konsil)-Dienstes

**23. Ich fühle mich durch die spezialisierte Palliativmedizin in meiner Arbeit unterstützt.**

- a) Stimme voll zu
- b) Stimme eher zu
- c) Neutral
- d) Stimme eher nicht zu
- e) Stimme gar nicht zu

**24. Die Zufriedenheit von Patienten oder Angehörigen wird durch das Hinzuziehen der spezialisierten Palliativmedizin in der Notaufnahme gesteigert.**

- a) Stimme voll zu
- b) Stimme eher zu
- c) Neutral
- d) Stimme eher nicht zu
- e) Stimme gar nicht zu

**25. Patienten, die eine Mitbehandlung durch die spezialisierte Palliativmedizin erhalten, haben mittelfristig weniger Beschwerden.**

- a) Stimme voll zu
- b) Stimme eher zu
- c) Neutral
- d) Stimme eher nicht zu
- e) Stimme gar nicht zu

**26. Die weiter- oder hauptbehandelnde Abteilung hat häufig Vorbehalte gegen eine Mitbehandlung durch die spezialisierte Palliativmedizin.**

- a) Stimme voll zu
- b) Stimme eher zu
- c) Neutral
- d) Stimme eher nicht zu
- e) Stimme gar nicht zu

**27. Wie häufig kommt es vor, dass Patienten oder Angehörige das Hinzuziehen der spezialisierten Palliativmedizin in der Zentralen Notaufnahme ablehnen?**

- a) Nie
- b) Selten
- c) Gelegentlich
- d) Häufig
- e) Immer
- f) Keine Angabe/Weiß nicht



## Außerklinische Ressourcen

- 28. Meine Stadt/mein Kreis bietet eine SAPV (spezialisierte ambulante Palliativversorgung) an**
- a) Ja
  - b) Nein
  - c) Weiß ich nicht
- 29. Ich habe die Möglichkeit, aus der Notaufnahme heraus Patienten in die SAPV einzubinden.**
- a) Ja
  - b) Nein
  - c) Habe ich noch nie versucht
  - d) Keine Angabe/weiß nicht
- 30. Falls das SAPV-Team (Ambulantes Palliativteam) Palliativpatienten mit Versorgungsproblemen in das Krankenhaus einweisen will, dann hat es einen festen Ansprechpartner**
- a) Ja
  - b) Nein
  - c) Keine Angabe/Weiß nicht
- 31. Im Einzugsbereich meiner Notaufnahme gibt es eine standardisierte Verfügung für den Notfall (Notfallausweis/gelber Zettel für den Rettungsdienst/...) mit dem der Rettungsdienst schnell über bestehende Therapielimitierungen informiert werden kann**
- a) Ja
  - b) Nein
  - c) Keine Angabe/Weiß nicht
  - d) Anderes, nämlich: \_\_\_\_\_
- 32. Die Ermittlung des tatsächlichen Patientenwillens in der Notaufnahme ist zu selten möglich.**
- a) Stimme voll zu
  - b) Stimme eher zu
  - c) Neutral
  - d) Stimme eher nicht zu
  - e) Stimme gar nicht zu

## Sterbende Patienten in der Zentralen Notaufnahme

**33. Patienten (ausgenommen Patienten unter Reanimation oder Polytraume) sollten nicht in der Zentralen Notaufnahme sterben**

- a) Stimme voll zu
- b) Stimme eher zu
- c) Neutral
- d) Stimme eher nicht zu
- e) Stimme gar nicht zu

**34. Wie oft sterben Patienten (ausgenommen Patienten unter Reanimation oder Polytrauma) in Ihrer Notaufnahme?**

- a) Nie
- b) Weniger als 1/Monat
- c) 1-3/Monat
- d) Wöchentlich
- e) Mehr als 1/Woche
- f) Weiß nicht/keine Angabe

**35. Patienten in der Finalphase werden in meiner Notaufnahme auf Station verlegt**

- a) Immer
- b) Häufig
- c) Gelegentlich
- d) Selten
- e) Nie
- f) Weiß nicht/keine Angabe

**36. Im stressigen Alltag einer Notaufnahme bleibt keine Zeit für die Begleitung von Patienten in der Finalphase.**

- a) Stimme voll zu
- b) Stimme eher zu
- c) Neutral
- d) Stimme eher nicht zu
- e) Stimme gar nicht zu

**37. Welche räumlichen Strukturen halten Sie in Ihrer Notaufnahme für sterbende und verstorbene PatientInnen vor? (Mehrfachnennung möglich)**

- a) Ein eigenes Palliativzimmer für Patienten in der Finalphase und ihre Angehörigen
- b) Es gibt Einzelzimmer in der Notaufnahme, die genutzt werden können
- c) Es gibt einen Abschiedsraum, in dem sich trauernde Angehörigen von Verstorbenen verabschieden können.
- d) Es stehen nur Untersuchungskabinen zur Verfügung
- e) In der Notaufnahme gibt es keine abgetrennten geeigneten Räume
- f) Sonstiges: \_\_\_\_\_

**38. In belastenden Situationen besteht die Möglichkeit, ein Kriseninterventionsteam oder einen (Notfall-)seelsorger hinzuzuziehen.**

- a) Ja
- b) Nein
- c) Keine Angabe/Weiß nicht

**39. In meiner Notaufnahme gibt es die Möglichkeit, eine Pflegekraft für die Zeit der Begleitung eines Patienten in der Finalphase freizustellen.**

- a) Ja
- b) Nein
- c) Keine Angabe/Weiß nicht

**40. In meiner Notaufnahme gibt es ein Training für die Gesprächsführung in schwierigen medizinischen Situationen.**

- a) Ja
- b) Nein
- c) Keine Angabe/Weiß nicht

**41. In meiner Notaufnahme gibt es eine regelmäßige Supervision für KollegInnen nach belastenden Situationen.**

- a) Ja
- b) Nein
- c) Keine Angabe/Weiß nicht
